# Supplementary material for: Isosteviol Sodium Protects against Ischemic Stroke by Modulating Microglia/Macrophage Polarization via Disruption of GAS5/miR-146a-5p sponge
Source: PubMed Central journal article supplement (PMC6704123; doi:10.1038/s41598-019-48759-0), 2019-08-21

**Isosteviol Sodium Protects against Ischemic Stroke by  
Modulating Microglia/Macrophage Polarization via Disruption of  
GAS5/miR-146a-5p sponge**

**Hao Zhang, Minyi Lu, Xiaofeng Zhang, Yihe Kuai, Ying Mei, Qiwen Tan, Kailun Zhong, Xiaoou Sun\*, and Wen Tan\***

Institute of Biomedical and Pharmaceutical Sciences, Guangdong University of Technology, Guangzhou, China

\* Corresponding author: Xiaoou Sun, Ph.D. Wen Tan, MD., Ph.D.

Xiaoou Sun, Institute of Biomedical and Pharmaceutical sciences, Guangdong University of Technology, Guangzhou 510006, China. xiaousun@gdut.edu.cn, Tel: 13539850005

Wen Tan, Institute of Biomedical and Pharmaceutical sciences, Guangdong University of Technology, Guangzhou 510006, China. went@gdut.edu.cn, Tel: 13928954505

**Supporting Information 1. Western blotting results.**

- 1) This file contains the original blot images of all the samples.
- 2) Guarantee 3 independent repeated experiments for every case.
- 3) The framed areas were used in the main text.

**Figure 5E**

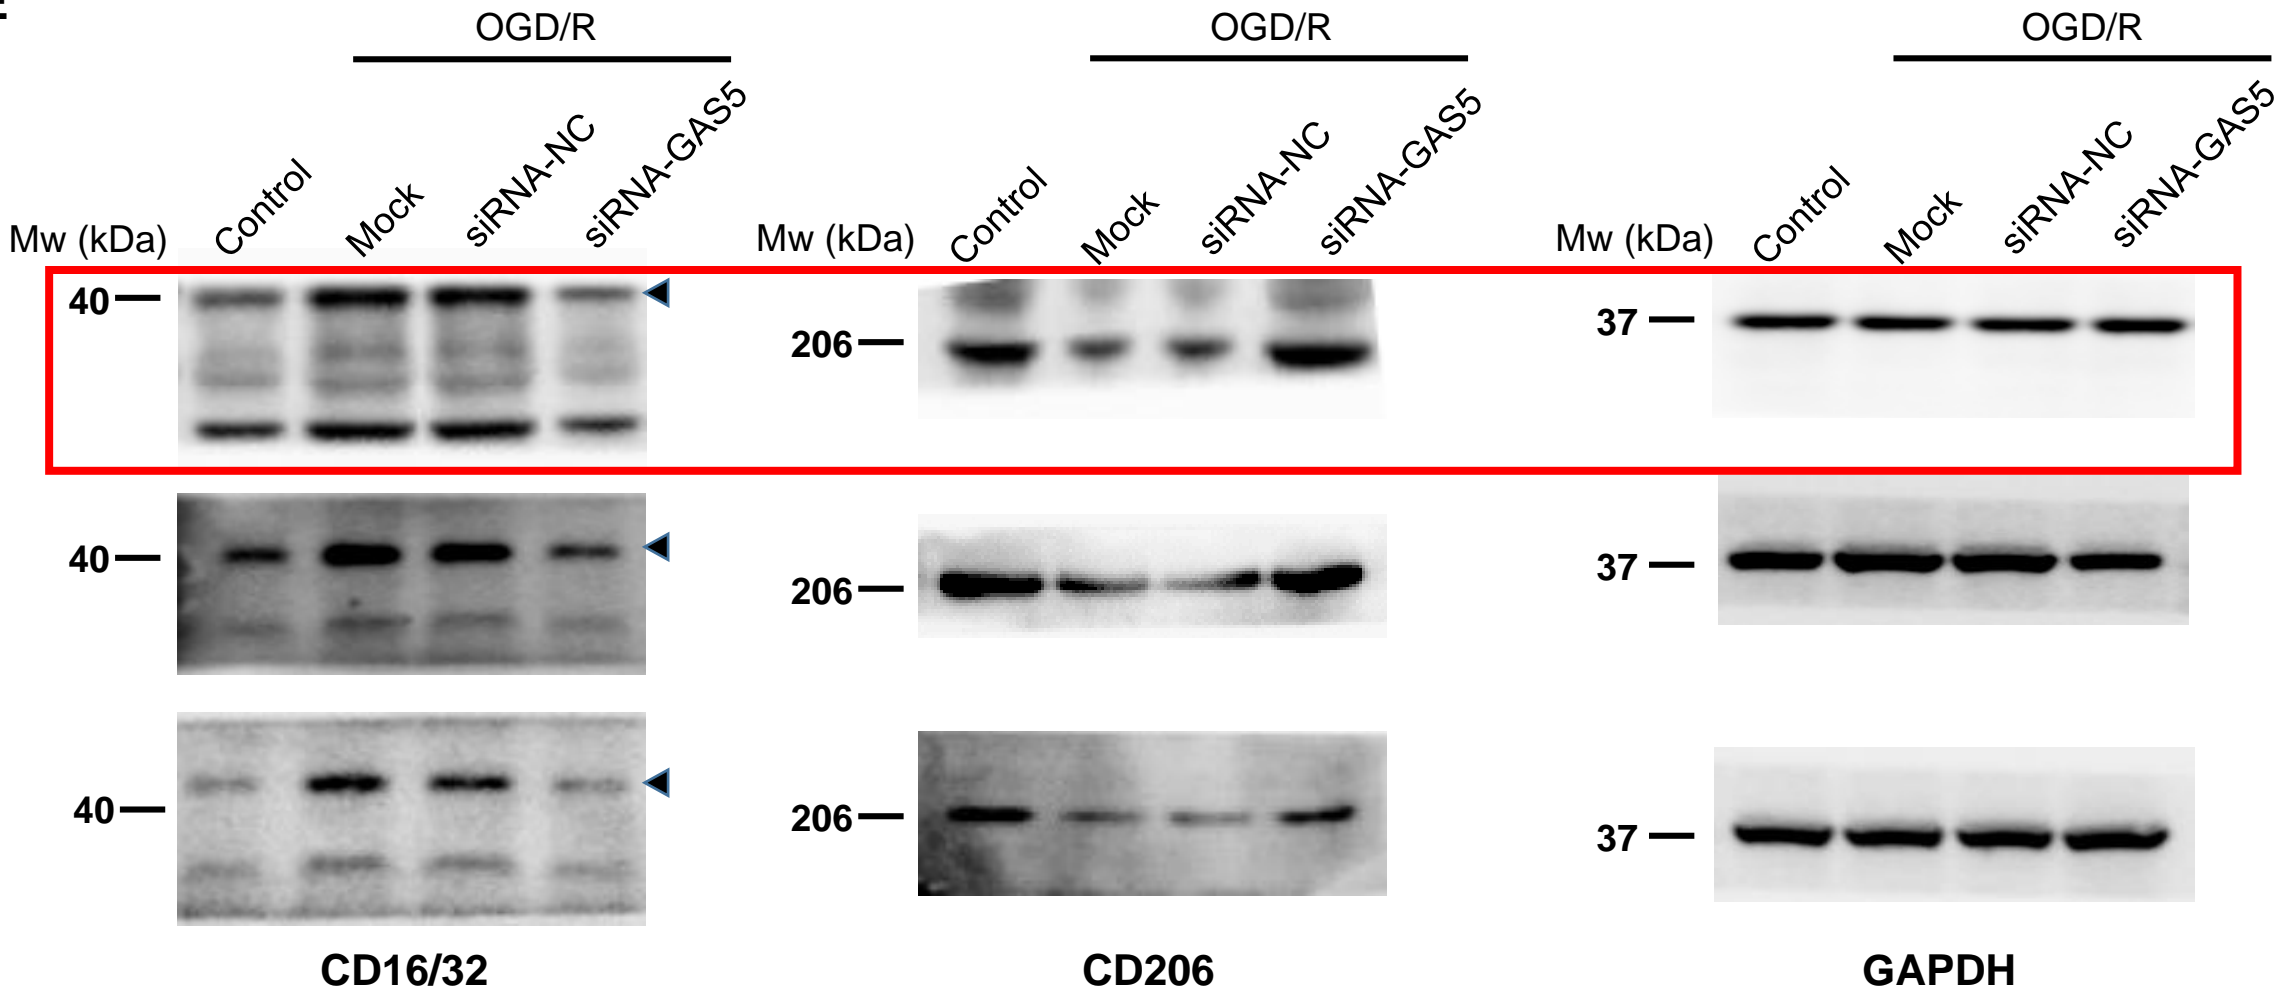

**Figure 5F**

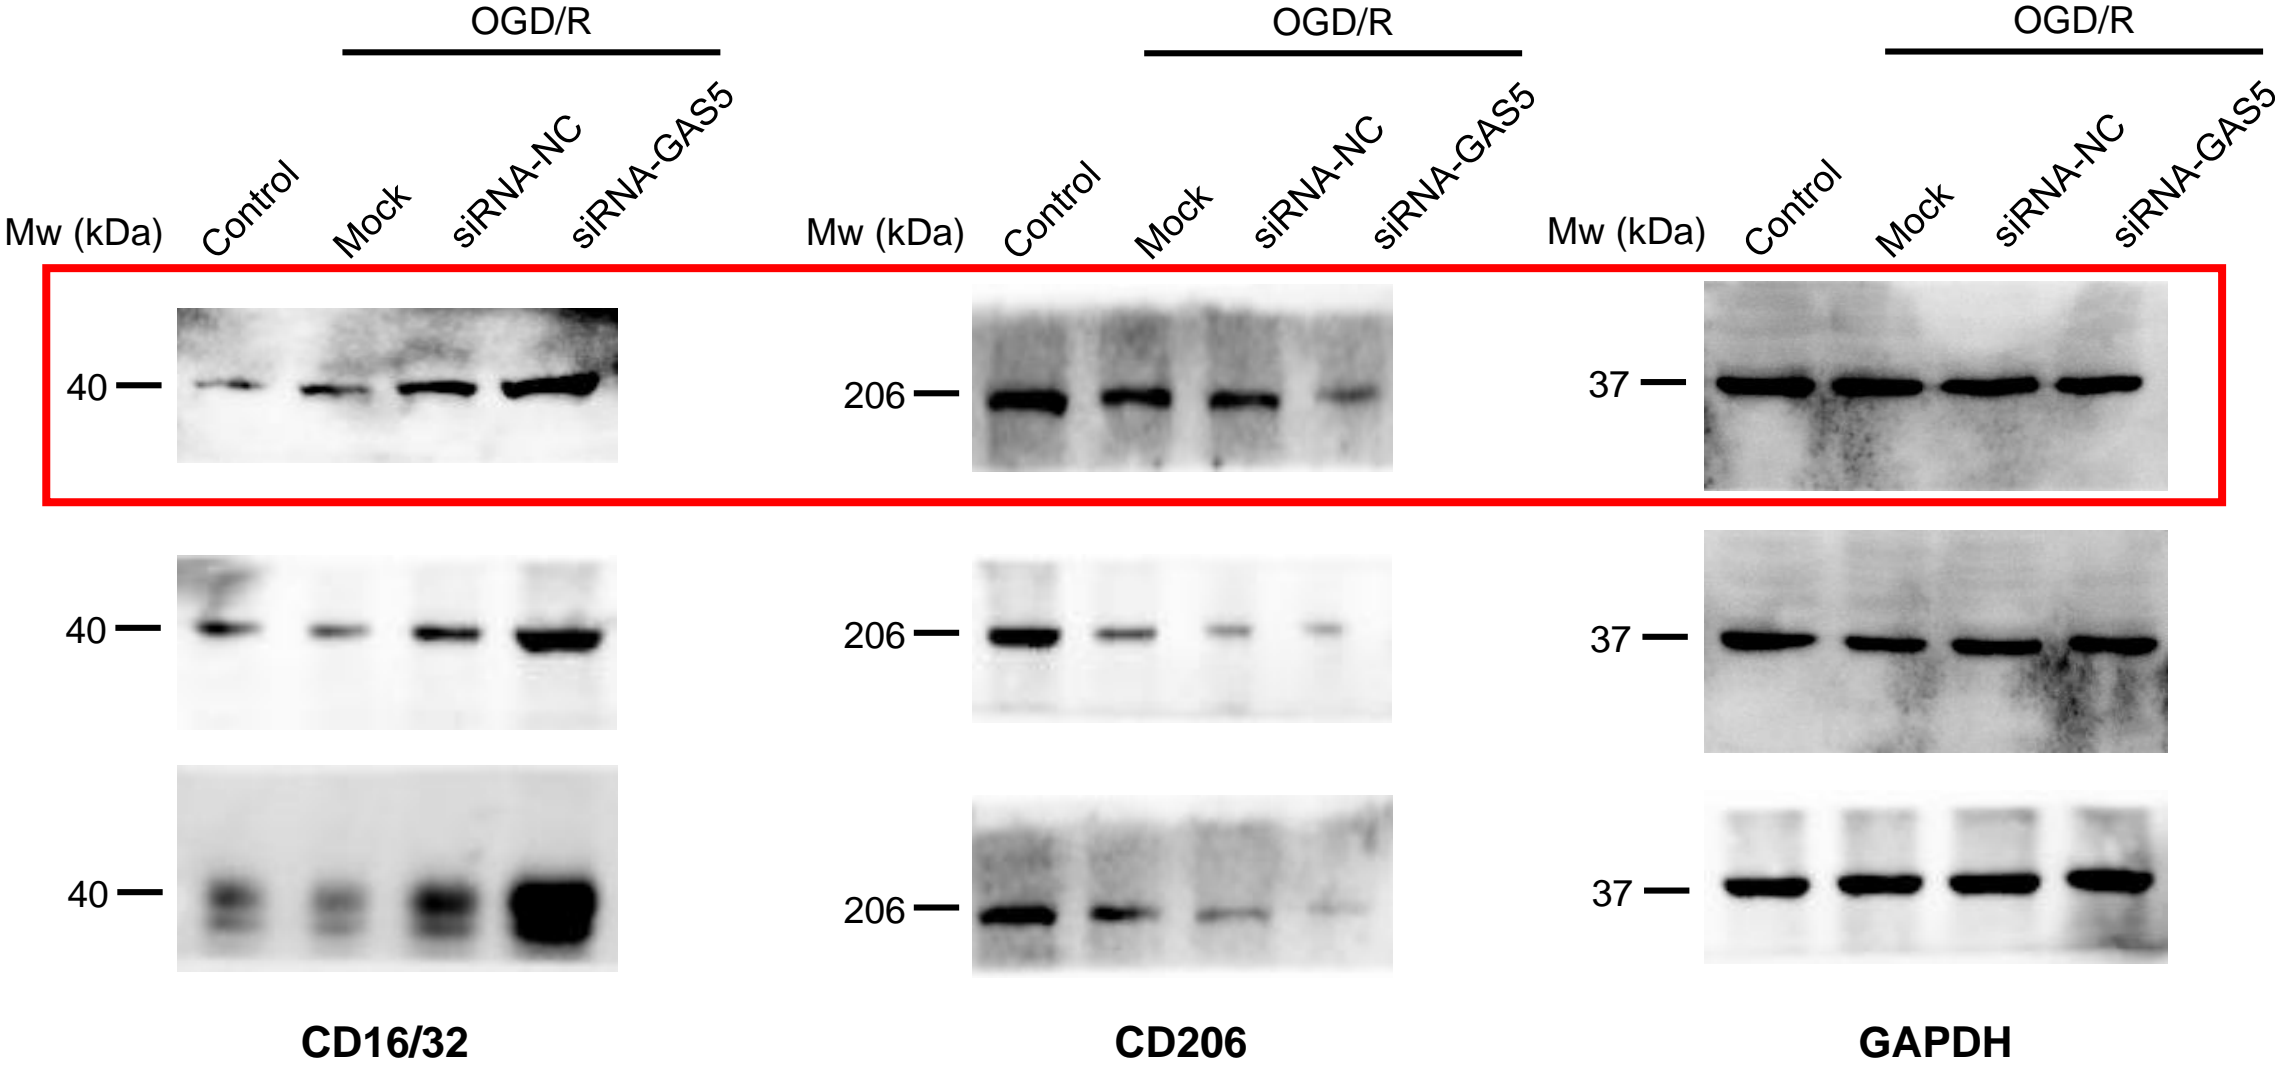

**Figure 7E**

**E**

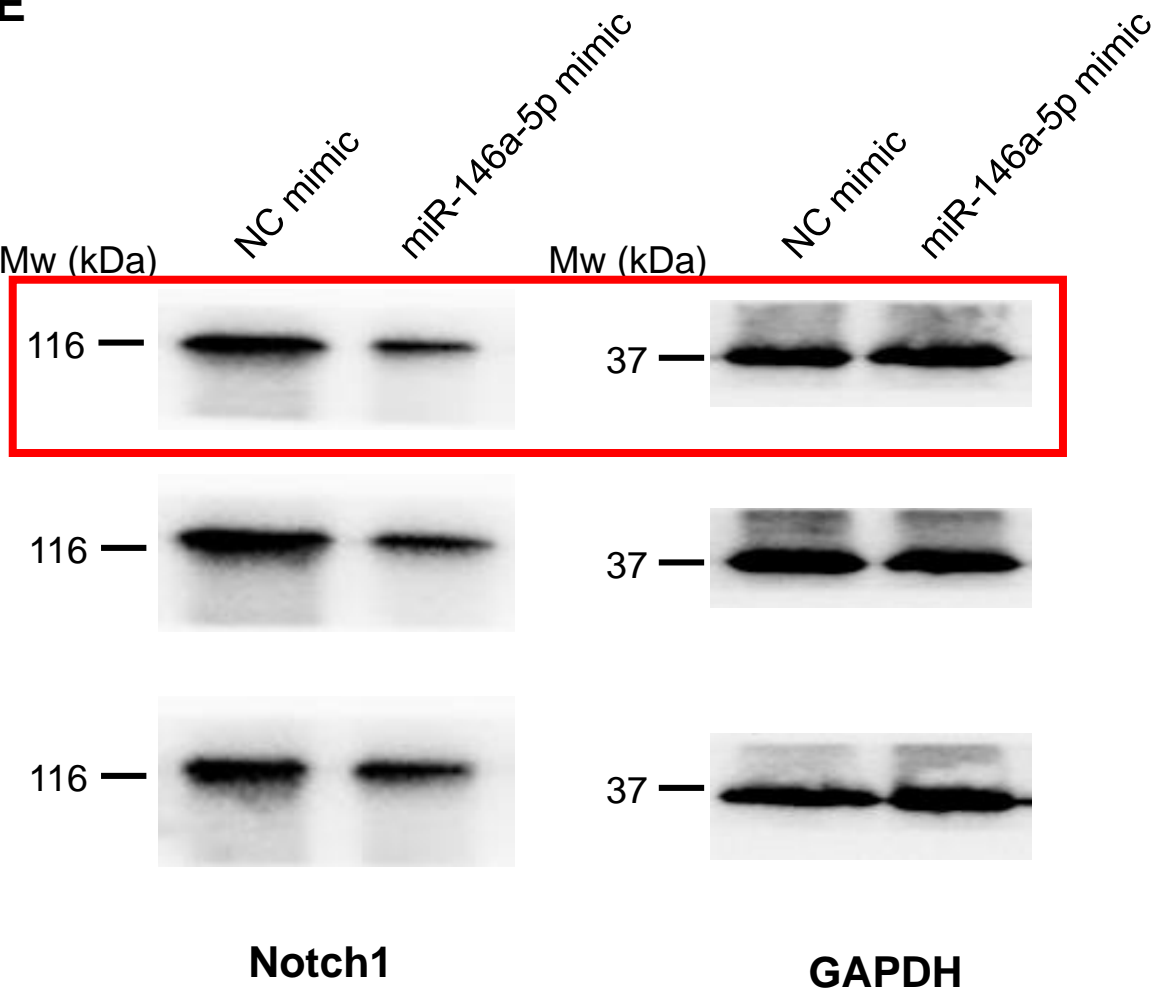

**G**

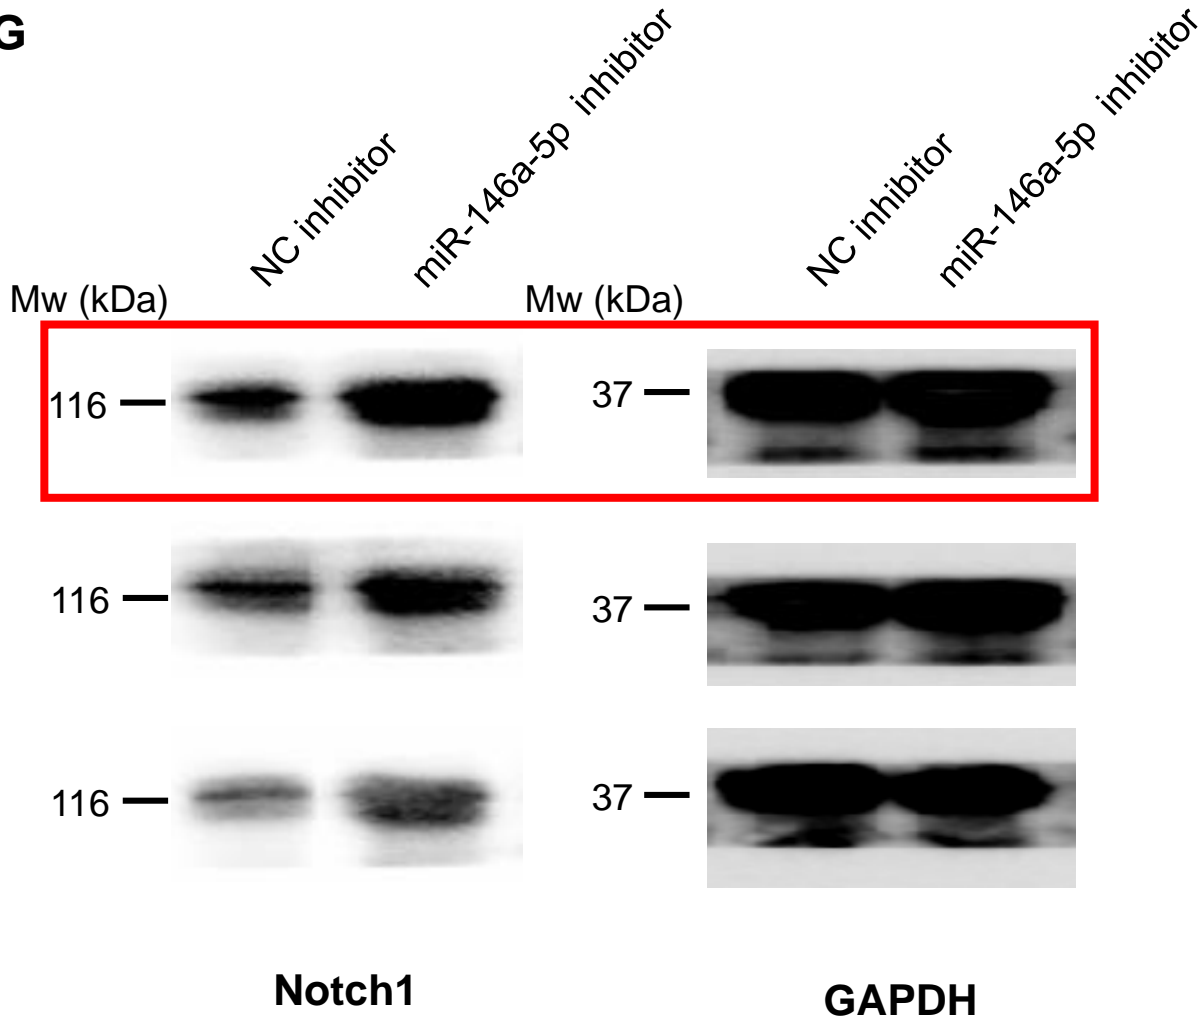

**Figure 8C**

|                   |   |   |   |   |   |   |
|-------------------|---|---|---|---|---|---|
| Control           | + | - | - | - | - | - |
| OGD/R             | - | + | + | + | + | + |
| pcDNA3.1-NC       | - | - | + | - | - | - |
| pcDNA3.1-GAS5     | - | - | - | + | + | + |
| NC mimic          | - | - | - | - | + | - |
| miR-146a-5p mimic | - | - | - | - | - | + |

|                   |   |   |   |   |   |   |
|-------------------|---|---|---|---|---|---|
| Control           | + | - | - | - | - | - |
| OGD/R             | - | + | + | + | + | + |
| pcDNA3.1-NC       | - | - | + | - | - | - |
| pcDNA3.1-GAS5     | - | - | - | + | + | + |
| NC mimic          | - | - | - | - | + | - |
| miR-146a-5p mimic | - | - | - | - | - | + |

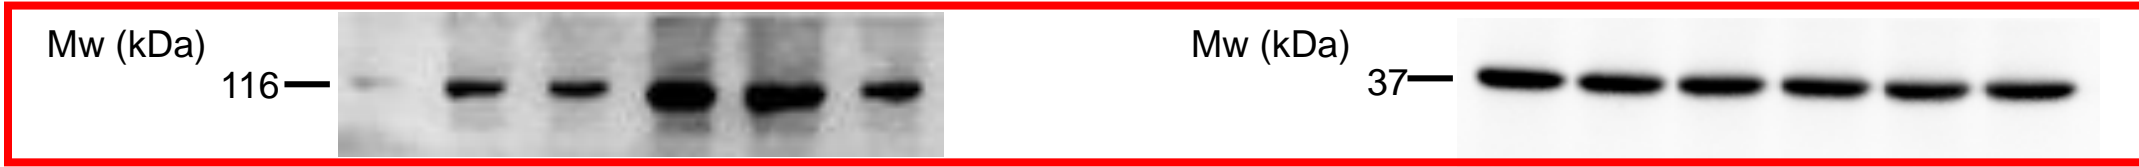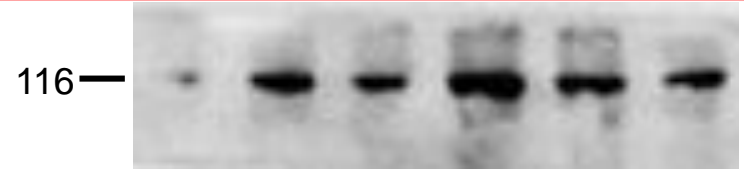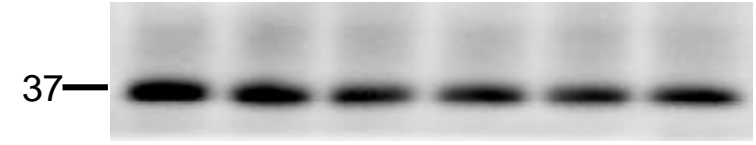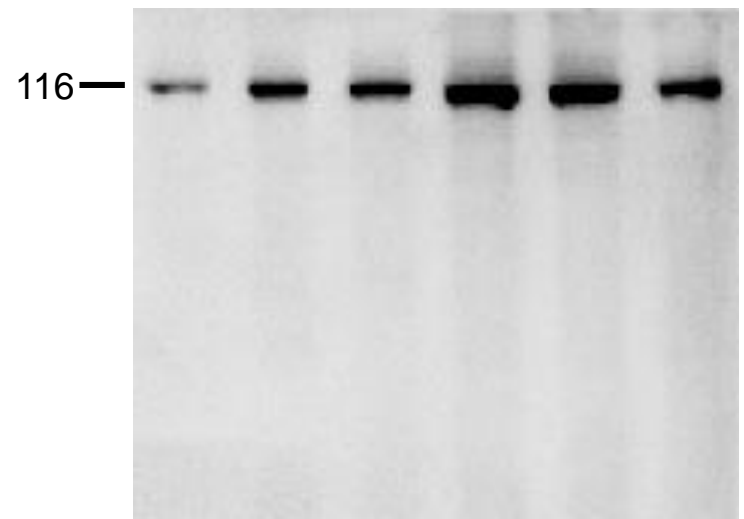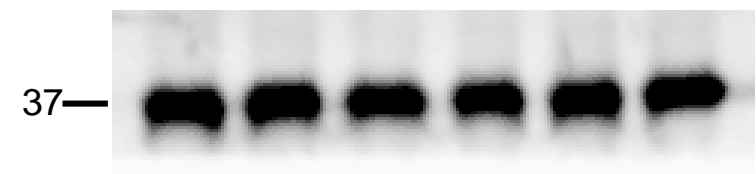

**Notch1**

**GAPDH**

**Figure 8E**

|                              |   |   |   |   |   |   |
|------------------------------|---|---|---|---|---|---|
| <b>Control</b>               | + | - | - | - | - | - |
| <b>OGD/R</b>                 | - | + | + | + | + | + |
| <b>siRNA-NC</b>              | - | - | + | - | - | - |
| <b>siRNA-GAS5</b>            | - | - | - | + | + | + |
| <b>NC inhibitor</b>          | - | - | - | - | + | - |
| <b>miR-146a-5p inhibitor</b> | - | - | - | - | - | + |

|                              |   |   |   |   |   |   |
|------------------------------|---|---|---|---|---|---|
| <b>Control</b>               | + | - | - | - | - | - |
| <b>OGD/R</b>                 | - | + | + | + | + | + |
| <b>siRNA-NC</b>              | - | - | + | - | - | - |
| <b>siRNA-GAS5</b>            | - | - | - | + | + | + |
| <b>NC inhibitor</b>          | - | - | - | - | + | - |
| <b>miR-146a-5p inhibitor</b> | - | - | - | - | - | + |

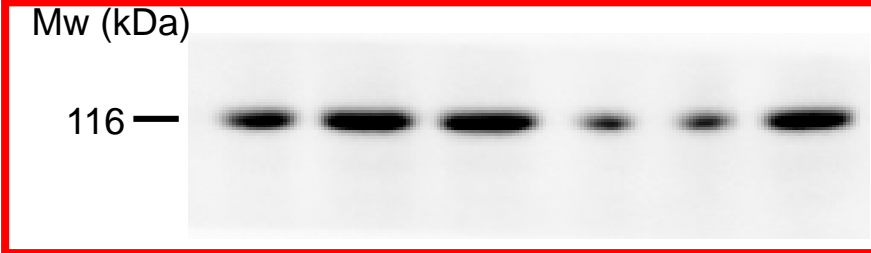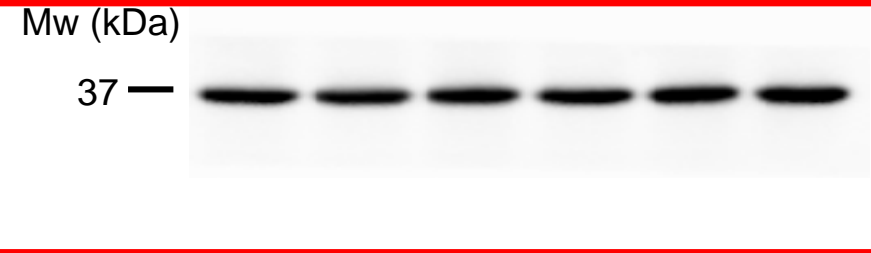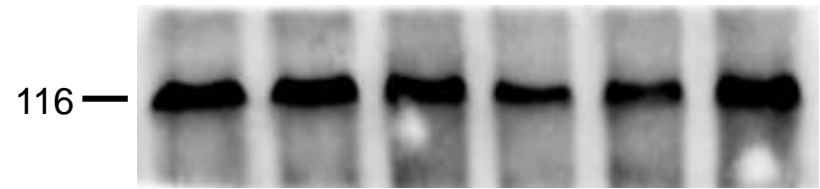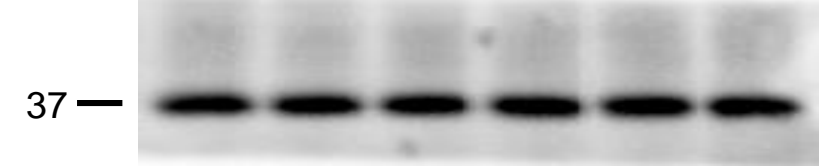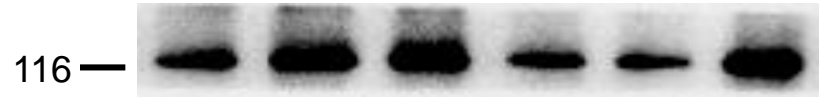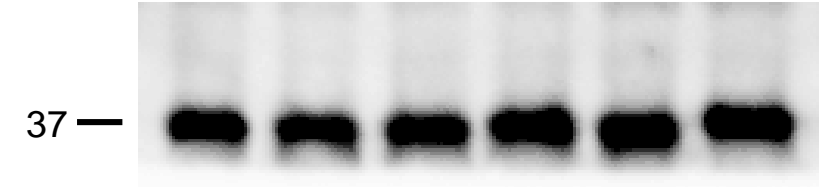

**Notch1**

**GAPDH**

**Figure 10**

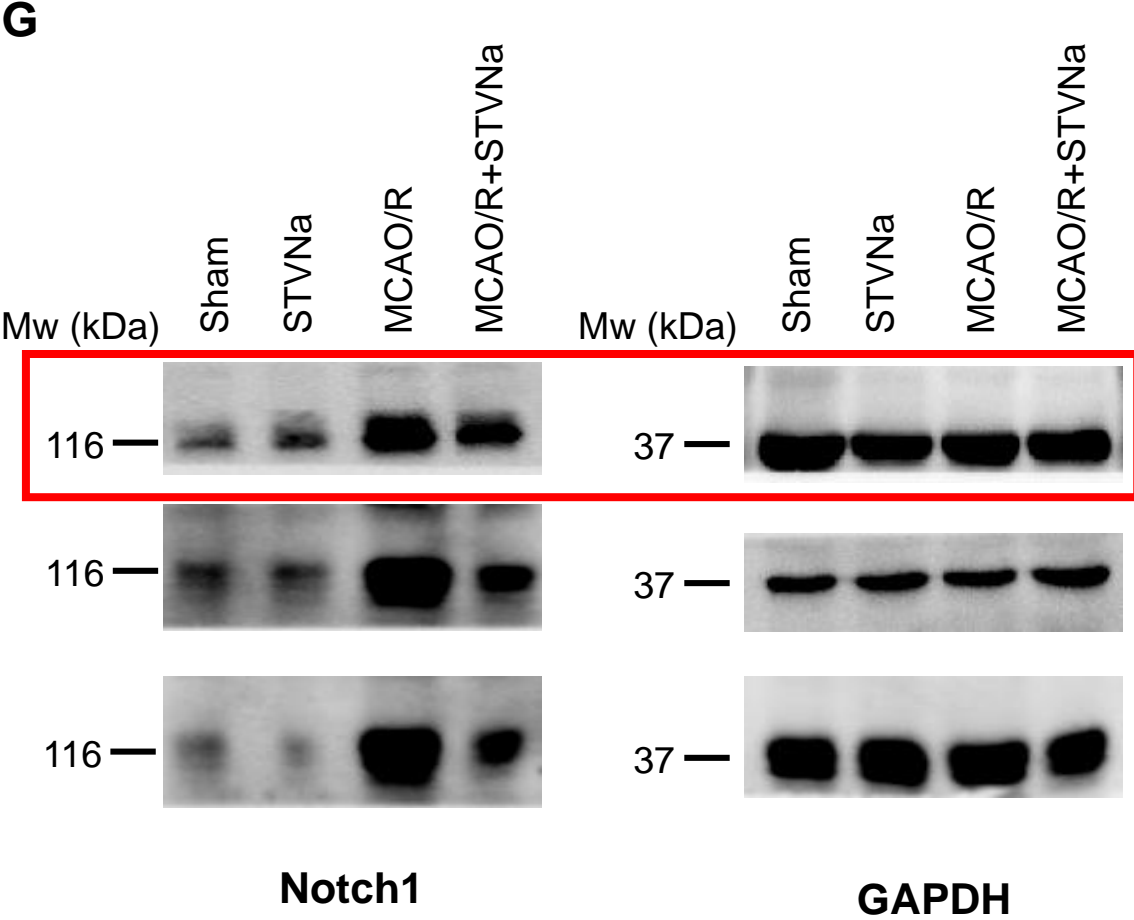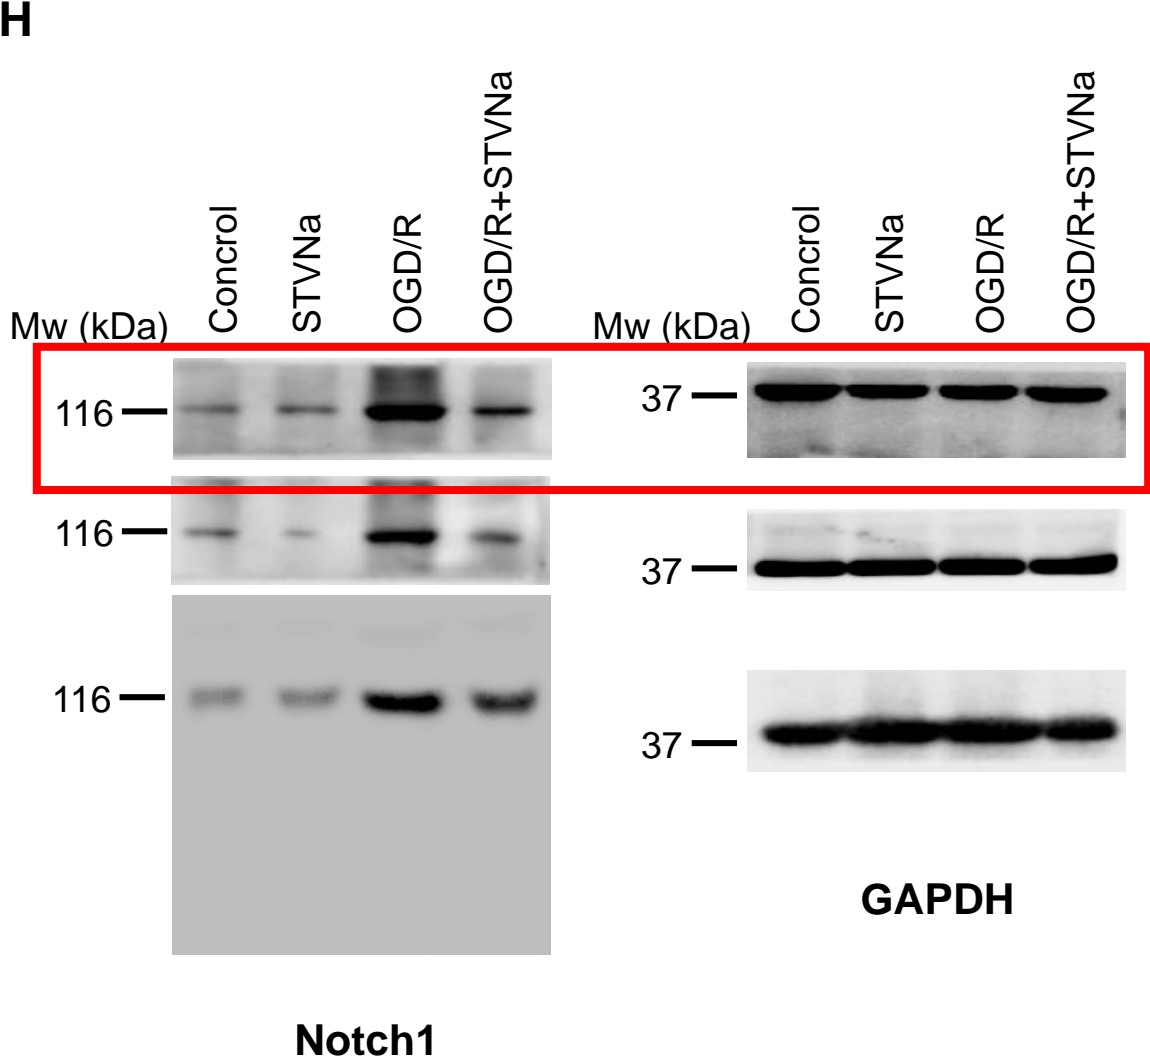

Supplement: 41598_2019_48759_MOESM1_ESM.pdf [file 41598_2019_48759_MOESM1_ESM.pdf]
